# Supplementary material for: Induced cytotoxicity of peptides with crypto-thioester through native chemical ligation
Source: Royal Society of Chemistry journal article supplement (doi:10.1039/d2nj05037d), 2023-01-01
Supplement: d2nj05037d1.pdf [file d2nj05037d1.pdf]

**Electronic Supplementary Information**

**Induced Cytotoxicity of Peptides with Crypto-  
Thioester by Native Chemical Ligation**

*Jeonghun Lee,<sup>\*,a</sup> Eun-Taex Oh,<sup>b</sup> Jinhyeok Kim,<sup>a</sup> Kitae Kim,<sup>a</sup> Heon Joo Park,<sup>c</sup>  
and Chulhee Kim<sup>\*,a</sup>*

<sup>a</sup>Department of Polymer Science and Engineering, Program in Environmental and Polymer Engineering, Inha University, Incheon 22212, Korea

<sup>b</sup>Department of Biomedical Sciences, College of Medicine, Inha University, Incheon 22212, Korea

<sup>c</sup>Department of Microbiology, Research Center for Controlling Intracellular Communication, Program in Biomedical Science & Engineering, Inha University, Incheon 22212, Korea

**\*Corresponding Author:** jeonghunlee@inha.ac.kr, chk@inha.ac.kr

### **Experimental Section**

**Circular dichroism.** Circular dichroism spectra were recorded on a Jasco J-815 spectropolarimeter (Tokyo, Japan) between 190 and 250 nm at room temperature using a quartz cell with 1 mm path length. The concentration of peptides was 30  $\mu$ M in PBS buffer (1 mM, pH 7.4) or in PBS/TFE mixed solvent (1:1, v/v). Five scans with a scan speed of 20 nm/min were averaged for each measurement. The percentage  $\alpha$ -helicity was calculated from the mean residue ellipticity at 222 nm using following equation:

$$\% \text{helicity} = [\theta]_{222} / [\theta]_{\text{max}} \times 100$$

$$[\theta]_{\text{max}} = -40,000 \times (1 - 4 / n)$$

where  $[\theta]_{222}$  is the mean residue ellipticity,  $[\theta]_{\text{max}}$  is the maximal mean residue ellipticity and n is the number of amino acids.<sup>1,2</sup>

**Cell lines and culture conditions.** H1299 human lung adenocarcinoma cells were purchased from the American Type Culture Collection (ATCC) and cultured in RPMI-1640 medium. Cells were incubated at 37 °C in a 5% CO<sub>2</sub>-containing humidified incubator.

### **References**

- 1 W. C. Johnson, Jr. and I. Tinoco, Jr., *J. Am. Chem. Soc.*, 1972, **94**, 4389-4390.
- 2 J. R. Kumita, O. S. Smart and G. A. Woolley, *Proc. Natl. Acad. Sci. U.S.A.*, 2000, **97**, 3803-3808.

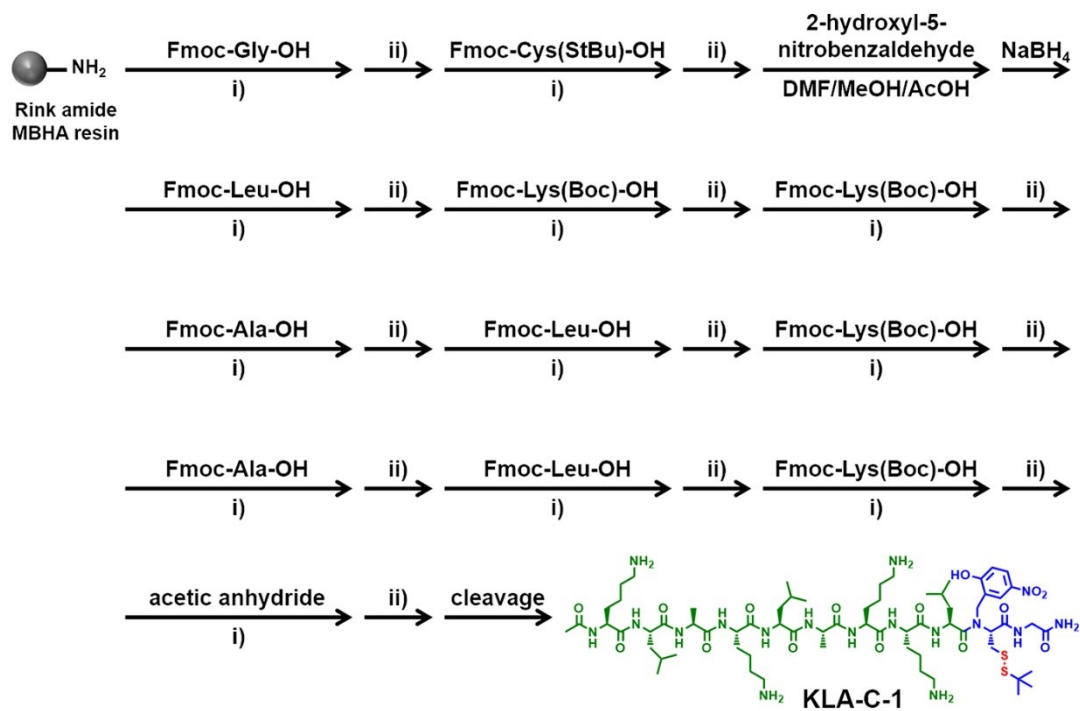

Fig. S1 Synthetic route to KLA-C-1 peptide.

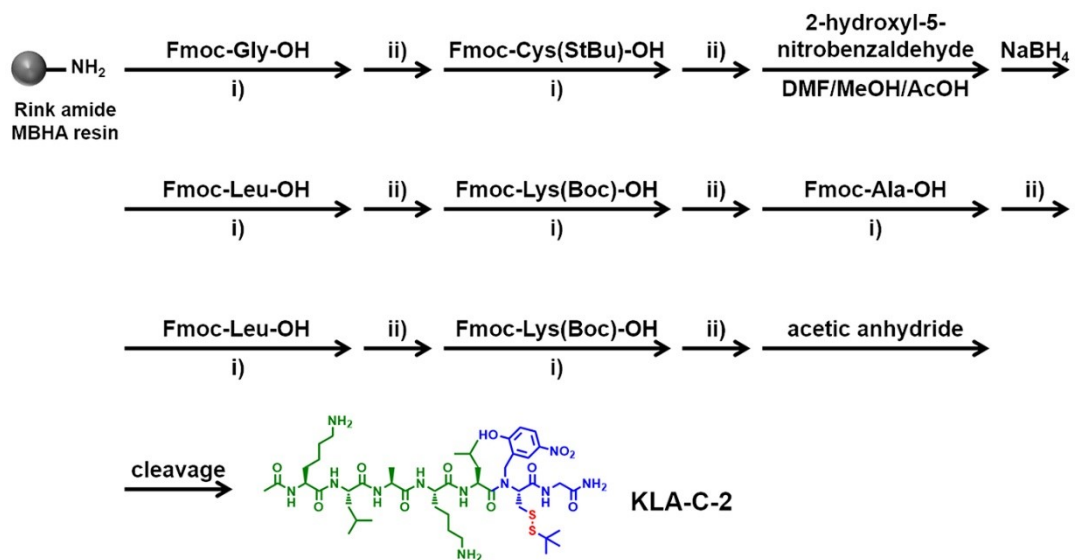

Fig. S2 Synthetic route to KLA-C-2 peptide.

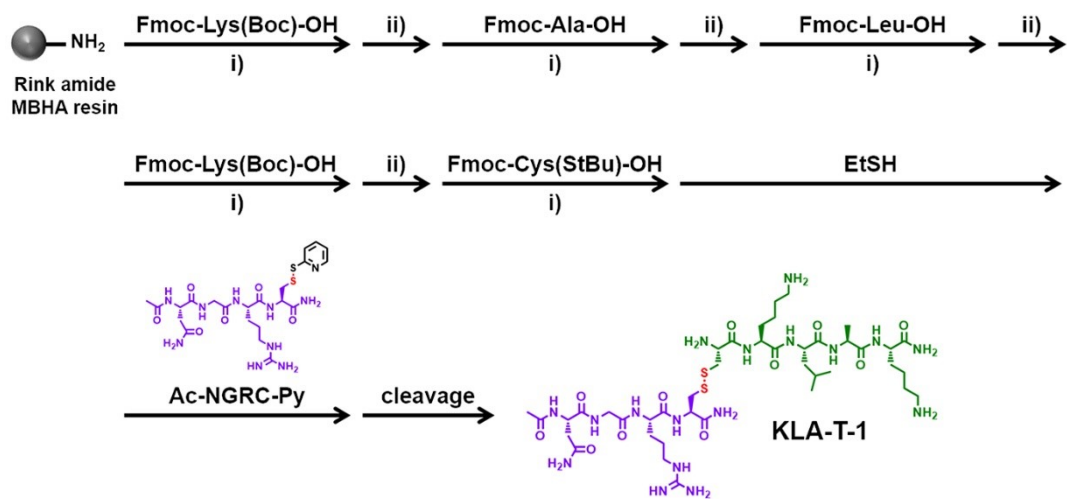

Fig. S3 Synthetic route to KLA-T-1 peptide.

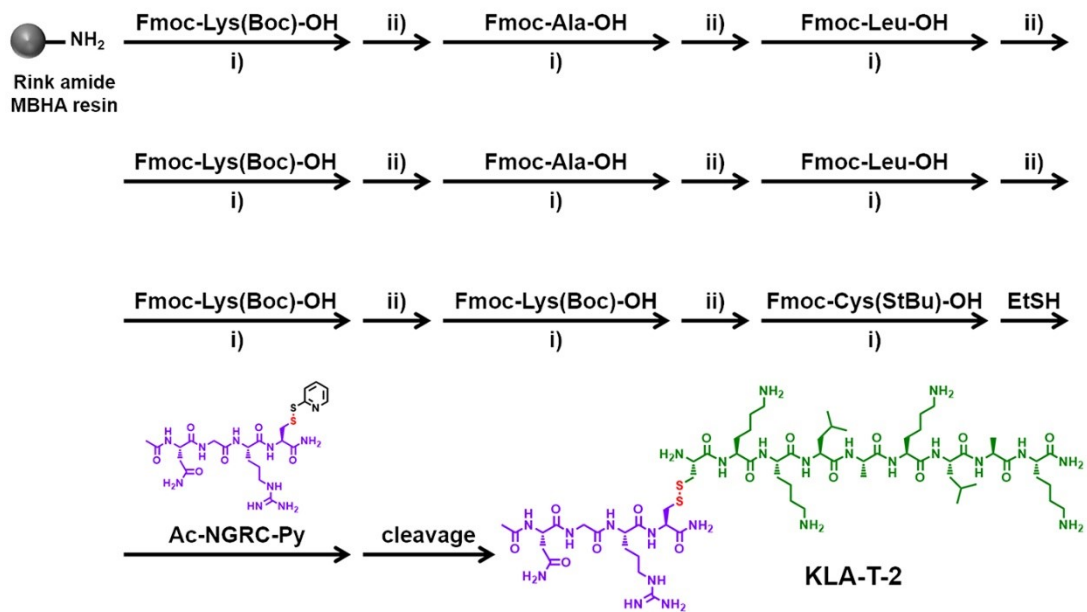

Fig. S4 Synthetic route to KLA-T-2 peptide.

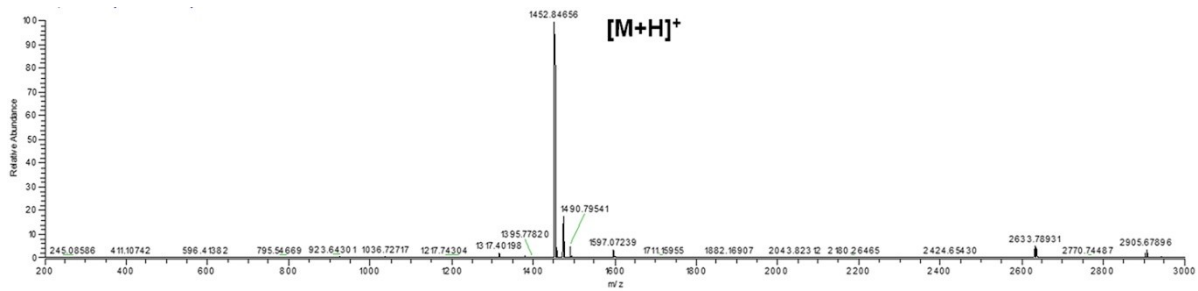

Fig. S5 LC-Mass spectrum of KLA-C-1.

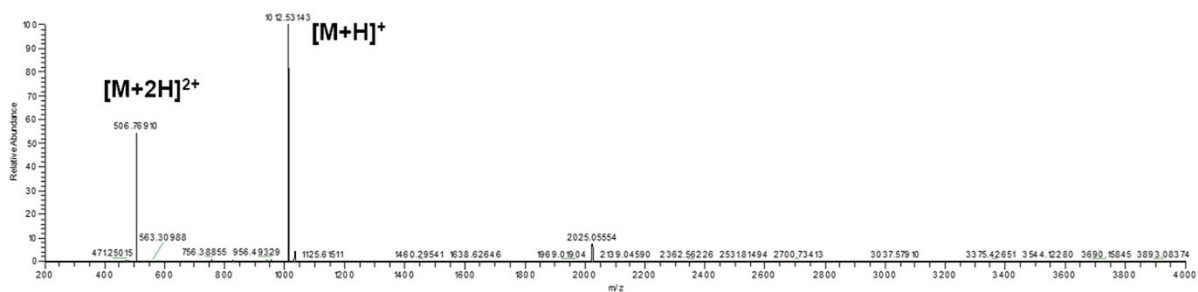

Fig. S6 LC-Mass spectrum of KLA-C-2.

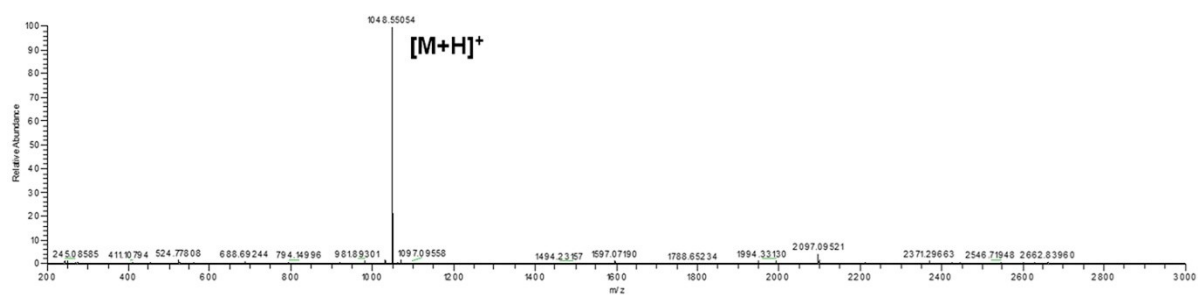

Fig. S7 LC-Mass spectrum of KLA-T-1.

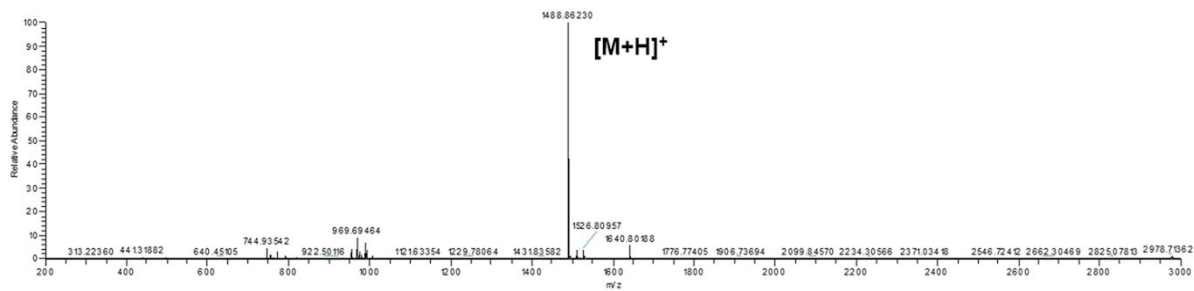

Fig. S8 LC-Mass spectrum of KLA-T-2.

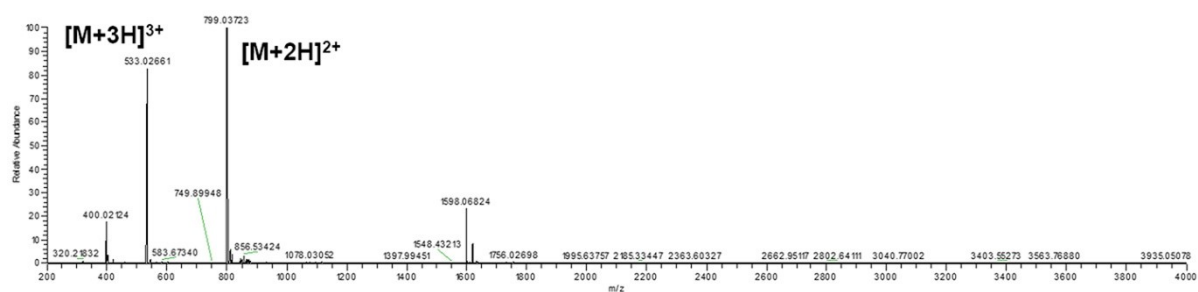

Fig. S9 LC-Mass spectrum of KLA-1.

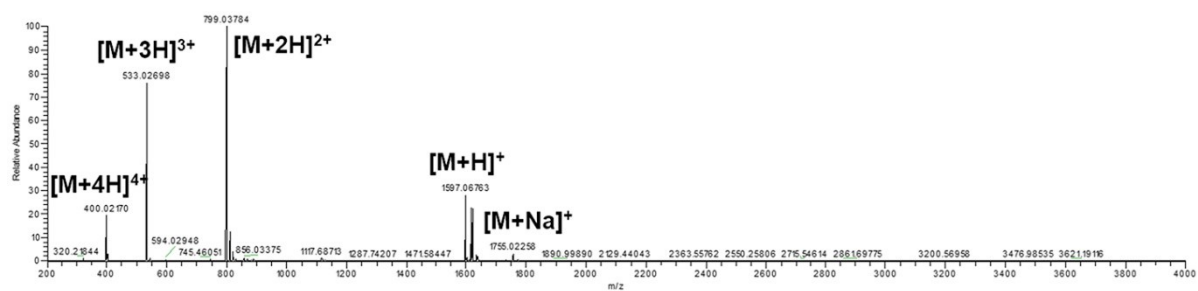

Fig. S10 LC-Mass spectrum of KLA-2.
